# Supplementary material for: PMRT1, a Plasmodium-Specific Parasite Plasma Membrane Transporter, Is Essential for Asexual and Sexual Blood Stage Development
Source: PubMed Central journal article supplement (PMC9040750; doi:10.1128/mbio.00623-22), 2022-04-11
Supplement: mbio.00623-22-st001.pdf [file mbio.00623-22-st001.pdf]

**Table S1: Oligonucleotides (A) and plasmids (B) used in this study.**

**A**

| internal # | Target or Primer name             | Sequence                                   | Purpose                            |
|------------|-----------------------------------|--------------------------------------------|------------------------------------|
| 284        | PF3D7_0716900 rv                  | GGGacgcgtTAACATCAATTTTCTTTTTGGG            | cloning GFP-glmS                   |
| 285        | PF3D7_0716900 fw                  | GGGgcgccgctaaGGGTGTGGTAATTCAAGTACG         |                                    |
| 280        | PF3D7_0523800 rv                  | GGGacgcgtATTTCGTTGAATATAATTTTTTAATTG       |                                    |
| 281        | PF3D7_0523800 fw                  | GGGgcgccgctaaGTTTTCTTGTGGTATTTAGCTG        |                                    |
| 282        | PF3D7_0609100 rv                  | GGGacgcgtATGATTATGACCATGATCATGATC          |                                    |
| 283        | PF3D7_0609100 fw                  | GGGgcgccgctaaGGATAGCAGGTGTACGGTTTCTTTATC   |                                    |
| 288        | PF3D7_1440800 rv                  | GGGacgcgtATTAGTAATAGAATTTTCATCTTG          |                                    |
| 289        | PF3D7_1440800 fw                  | GGGgcgccgctaaCATTGCTTCAAATTTGATGAG         |                                    |
| 290        | Pf3D7_1135300 rv                  | GGGacgcgtAGAAGTTTTGGGGCATATTTCTTTG         |                                    |
| 338        | Pf3D7_0715900 (11)                | GGGgcgccgctaaCTGGAATAAAATAGATGGAACGTCTTG   |                                    |
| 339        | Pf3D7_0715900 (11)                | GGGacgcgtAGTATCCCCTTTCAATGTGGAAC           |                                    |
| 291        | Pf3D7_1135300 fw                  | GGGgcgccgctaaGTTATATTATAAAAGGATGATTGG      |                                    |
| 315        | PF3D7_0523800 (1) TGD fw          | GCGGCCGCTAAAGGAGCACTAAAGGCCAAAGGAAGT       |                                    |
| 316        | PF3D7_0523800 (1) TGD rv          | acgcgtAATAATGTCATCCTTTTCATTATTAATATT       |                                    |
| 317        | PF3D7_0609100 (2) TGD fw          | GCGGCCGCTAAGATTTGTTATTTGCAAAAATAATTTGTATT  |                                    |
| 318        | PF3D7_0609100 (2) TGD rv          | acgcgtATGTctataaaaaataaatcacatac           |                                    |
| 319        | PF3D7_0716900 (3) TGD fw          | GCGGCCGCTAAAAAATGAAATTATTTTTGTACGACATTC    |                                    |
| 320        | PF3D7_0716900 (3) TGD rv          | acgcgtGGCAATACCAAAGTAATTAATAAAATTCC        |                                    |
| 323        | PF3D7_1440800 (5) TGD fw          | GCGGCCGCTAAACAATGTTAAGGATGATGAAAATAATTTT   |                                    |
| 324        | PF3D7_1440800 (5) TGD rv          | acgcgtTGTATTAACAACAATAAAATACAGAACT         |                                    |
|            | Pf3D7_0715900 SLI-Tdg F           | GGTGC GGCCGCGTGGATAAGATGTCGCGTTTG          |                                    |
|            | Pf3D7_0715900 SLI-Tgd R           | GGTACGCGTGTGCCTACATTTTTATCATCTTCCTC        |                                    |
|            | PF3D7_1135300 – fw NotI TGD       | CTCGgcgccgctaaAAAAGTATGATCTCTGGAATATCCAG   | cloning 1135300 loxp               |
|            | PF3D7_1135300 – rv MluI TGD       | TCCTacgcgtATTTATAAAGAGATCTGTTTTATTATC      |                                    |
|            | PF3D7_1135300 fw NotI loxP:       | CTCGGCCGCGCCCGGTAATCTCTGGAATATCCAGCAAATTTG |                                    |
|            | PF3D7_1135300 rv SpeI loxP:       | TCCTACTAGTATTTATAAAGAGATCTGTTTTATTATC      |                                    |
|            | PF3D7_1135300 fw AvrII loxP:      | CTCGCCTAGGATGAAGTCAATGATAAGCGGTATTAG       | integration check PCR              |
|            | PF3D7_1135300 rv XmaI loxP:       | TCCTCCCGGGCTTGCTTCTTAGGTGCGTACTTTTTTAC     |                                    |
| 294        | PF3D7_0609100 int_fw              | GGTAGTAACAACCTTTGGTTGTTTTATTCC             |                                    |
| 295        | PF3D7_0609100 int_rv              | tatgtggaaggttaataatggacaaggg               |                                    |
| 296        | PF3D7_0716900 int_fw              | GAAATTATTTTTGTACGACATTCATACTA              |                                    |
| 298        | PF3D7_1440800 int_fw              | GCACAGAACATTTAAGAAGCAATGATTTTA             |                                    |
| 299        | PF3D7_1440800 int_rv              | caacttgactagccaaaatgtggtctgg               |                                    |
| 300        | PF3D7_1135300 int_fw              | GATCTCTGGAATATCCAGCAAATTTGTTG              |                                    |
| 302        | PF3D7_0716900 int_rv              | atatttatttttgaaccgataagctag                |                                    |
| 305        | PF3D7_1135300 int_rv              | gccatatattatacatattaaataaagac              |                                    |
| 308        | PF3D7_0523800 int_fw              | GGCCAAAGGAAGTTGGCTAACGGGGTGGTAG            |                                    |
| 309        | PF3D7_0523800 int_rv              | gtgtcattcattacctttgaatgg                   |                                    |
| 369        | TGD (PF3D7_0609100 ) int check fw | atatatgttttaagctcaaatg                     |                                    |
| 370        | TGD (PF3D7_0609100 ) int check rv | gaggagaagcaaaaacgaaagtaac                  |                                    |
| 392        | TGD (Pf3D7_0715900) int check fw  | CCCACCGAAATGAACTCTTCGTTGC                  |                                    |
| 393        | TGD (Pf3D7_0715900) int check rv  | CTTTACCTTTAGAGGAGGAATTATTAG                |                                    |
| 394        | SLI TGD it fw Adelaide            | gtggaattgtgagcggataac                      | cloning complementation constrcuts |
| 327        | Pf3D7_1135300 compl               | ctcgagATGAAGTCAATGATAAGCGG                 |                                    |
| 328        | Pf3D7_1135300 compl               | cctaggGCTTGTCTTAGGTGCGTACT                 |                                    |
| 553        | PKNH_0933400 fw 553               | GGGctcgagATGAAGGGAACGTACGTAG               |                                    |

|     |                           |                                             |                            |
|-----|---------------------------|---------------------------------------------|----------------------------|
| 554 | PKNH_0933400 rv 554       | GGGcctaggCACCGCCTTCGAGGCGTAC                |                            |
| 555 | PVP01_0936100 fw 555      | GGGctcgagATGAAGGGAACGTACGTCG                |                            |
| 556 | PVP01_0936100 rv 556      | GGGcctaggCACCGCCTTCGAGGCGTAC                |                            |
| p37 | Pf3D7_1135300 fw 5' (TKo) | GATTTTGATATATGATTATAGGATAG                  | excision PCR primer        |
|     | Neo 40 rv                 | CGAATAGCCTCTCCACCCAAG                       |                            |
|     | Pf3D7_1135300 fw NotI     | CTCGgcgccgctaaTTATTATAAATCATATAATAAAATAAATG | cloning 1135300-2xFKBP-GFP |
|     | Pf3D7_1135300 rv AvrII    | TCCTcctaggAGAAGTTTTTGGGGCATATTTCTTTG        |                            |
| 443 | Pf3D7_0715900 (11) KpnI   | GggtaccAGTATCCCCTTTCAATGTGGAAC              | cloning 0715900-3xHA       |
|     | GFP 633 fw                | GCCCTTTCGAAAGATCCC                          | confirmatory PCR           |
|     | glmS rv                   | GATTTCTCTTTGTTCAAGGAGTCACC                  |                            |

## B

|                                        |                           |
|----------------------------------------|---------------------------|
| pSLI- <i>Pf</i> FVRT1-GFP-glmS         | this study                |
| pSLI- <i>Pf</i> ZIP1-GFP-glmS          | this study                |
| pSLI- <i>Pf</i> CDF-GFP-glmS           | this study                |
| pSLI- <i>Pf</i> DMT2-GFP-glmS          | this study                |
| pSLI- <i>Pf</i> MFS6-GFP-glmS          | this study                |
| pSLI- <i>Pf</i> PMRT1-GFP-glmS         | this study                |
| pSLI- <i>Pf</i> FVRT1-GFP-TGD          | this study                |
| pSLI- <i>Pf</i> ZIP1-GFP-TGD           | this study                |
| pSLI- <i>Pf</i> CDF-GFP-TGD            | this study                |
| pSLI- <i>Pf</i> DMT2-GFP-TGD           | this study                |
| pSLI- <i>Pf</i> MFS6-GFP-TGD           | this study                |
| pSLI- <i>Pf</i> PMRT1-GFP-TGD          | this study                |
| pSLI- <i>Pf</i> CDF-3xHA               | this study                |
| pSLI- <i>Pf</i> PMRT1-2xFKBP-GFP       | this study                |
| P40PX-mCherry                          | Jonscher et al. 2018 (44) |
| pLyn-FRB-mCherry                       | Birnbaum et al. 2017 (41) |
| pACP-mCherry                           | Birnbaum et al. 2020 (46) |
| pARL- <i>ama1</i> ARO-mCherry          | Cabrera et al. 2012 (49)  |
| pARL- <i>ama1</i> AMA1-mCherry         | Wichers et al. 2021 (51)  |
| pSLI- <i>Pf</i> PMRT1-loxP             | this study                |
| pARL- <i>nmd3</i> <i>Pf</i> PMRT1-ty1  | this study                |
| pARL- <i>sf3a2</i> <i>Pf</i> PMRT1-ty1 | this study                |
| pHcamGDV1-GFP-DD-yDHODH                | this study                |
| pSkip-Flox                             | Birnbaum et al. 2017 (41) |
| pARL- <i>nmd3</i> <i>Pv</i> PMRT1-ty1  | this study                |
| pARL- <i>nmd3</i> <i>Pk</i> PMRT1-ty1  | this study                |
